# Supplementary material for: Tubular microdomains of Rab7-positive endosomes retrieve TrkA, a mechanism disrupted in Charcot–Marie–Tooth disease 2B
Source: Oxford University Press journal article supplement (doi:10.1242/jcs.258559), 2021-09-06
Supplement: jcs258559supp.pdf [file jcs258559supp.pdf]

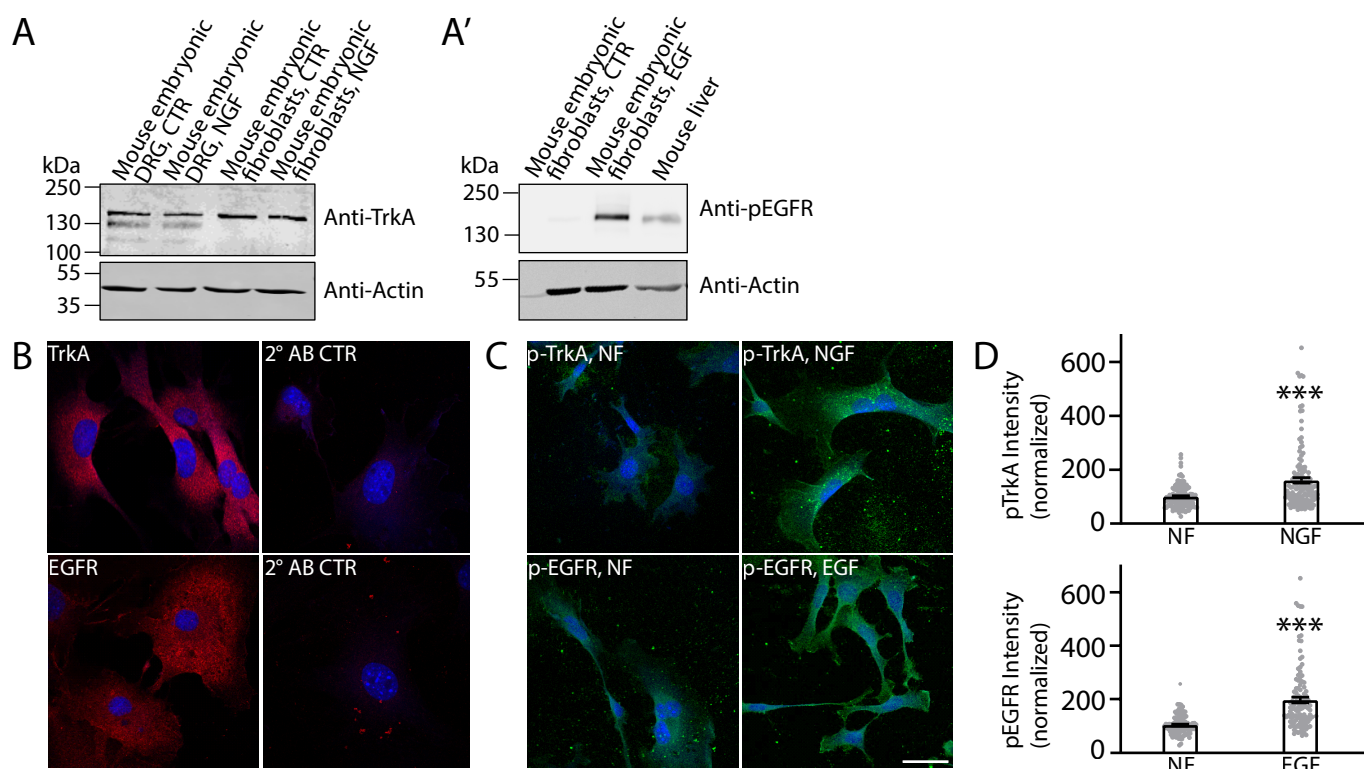

**Fig. S1. Trk and EGFR expression and functionality in MEFs.** (A, A') Expression of TrkA and EGFR in MEFs using Western Blot. (B) Expression of TrkA and EGFR in MEFs using immunocytochemistry. (C) Images of pTrkA, and pEGFR immunostaining in cultured MEFs in "no factor" (NF) untreated conditions and following treatment with respective ligand (100ng/ml NGF or EGF) for 20 minutes; scale bar= 40  $\mu$ m. (D) Quantification of pTrkA and pEGFR signal in MEFs in NF and ligand stimulated conditions, normalized to NF. PTrkA NF vs NGF: df=254,  $p < 0.0001$ ; pEGFR NF vs EGF: df=108,  $p < 0.0001$ . Significance was determined by Student's t-test, n=30 images per condition in three independent experiments; error=SEM, \*\*\* $p < 0.001$ .

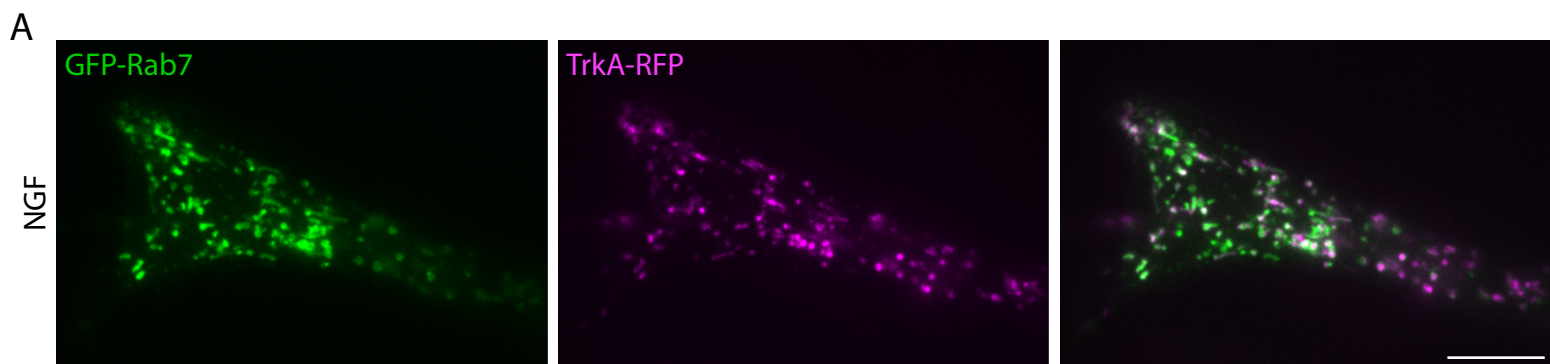

**Fig. S2. TrkA-RFP expression in MEFs in live-TIRF.** (A,) Representative TIRF microscopy images of MEFs co-transfected with GFP-tagged Rab7 and RFP-tagged TrkA in the presence of NGF from the same culture as images in Figure 2G; scale bar= 10 $\mu$ m.

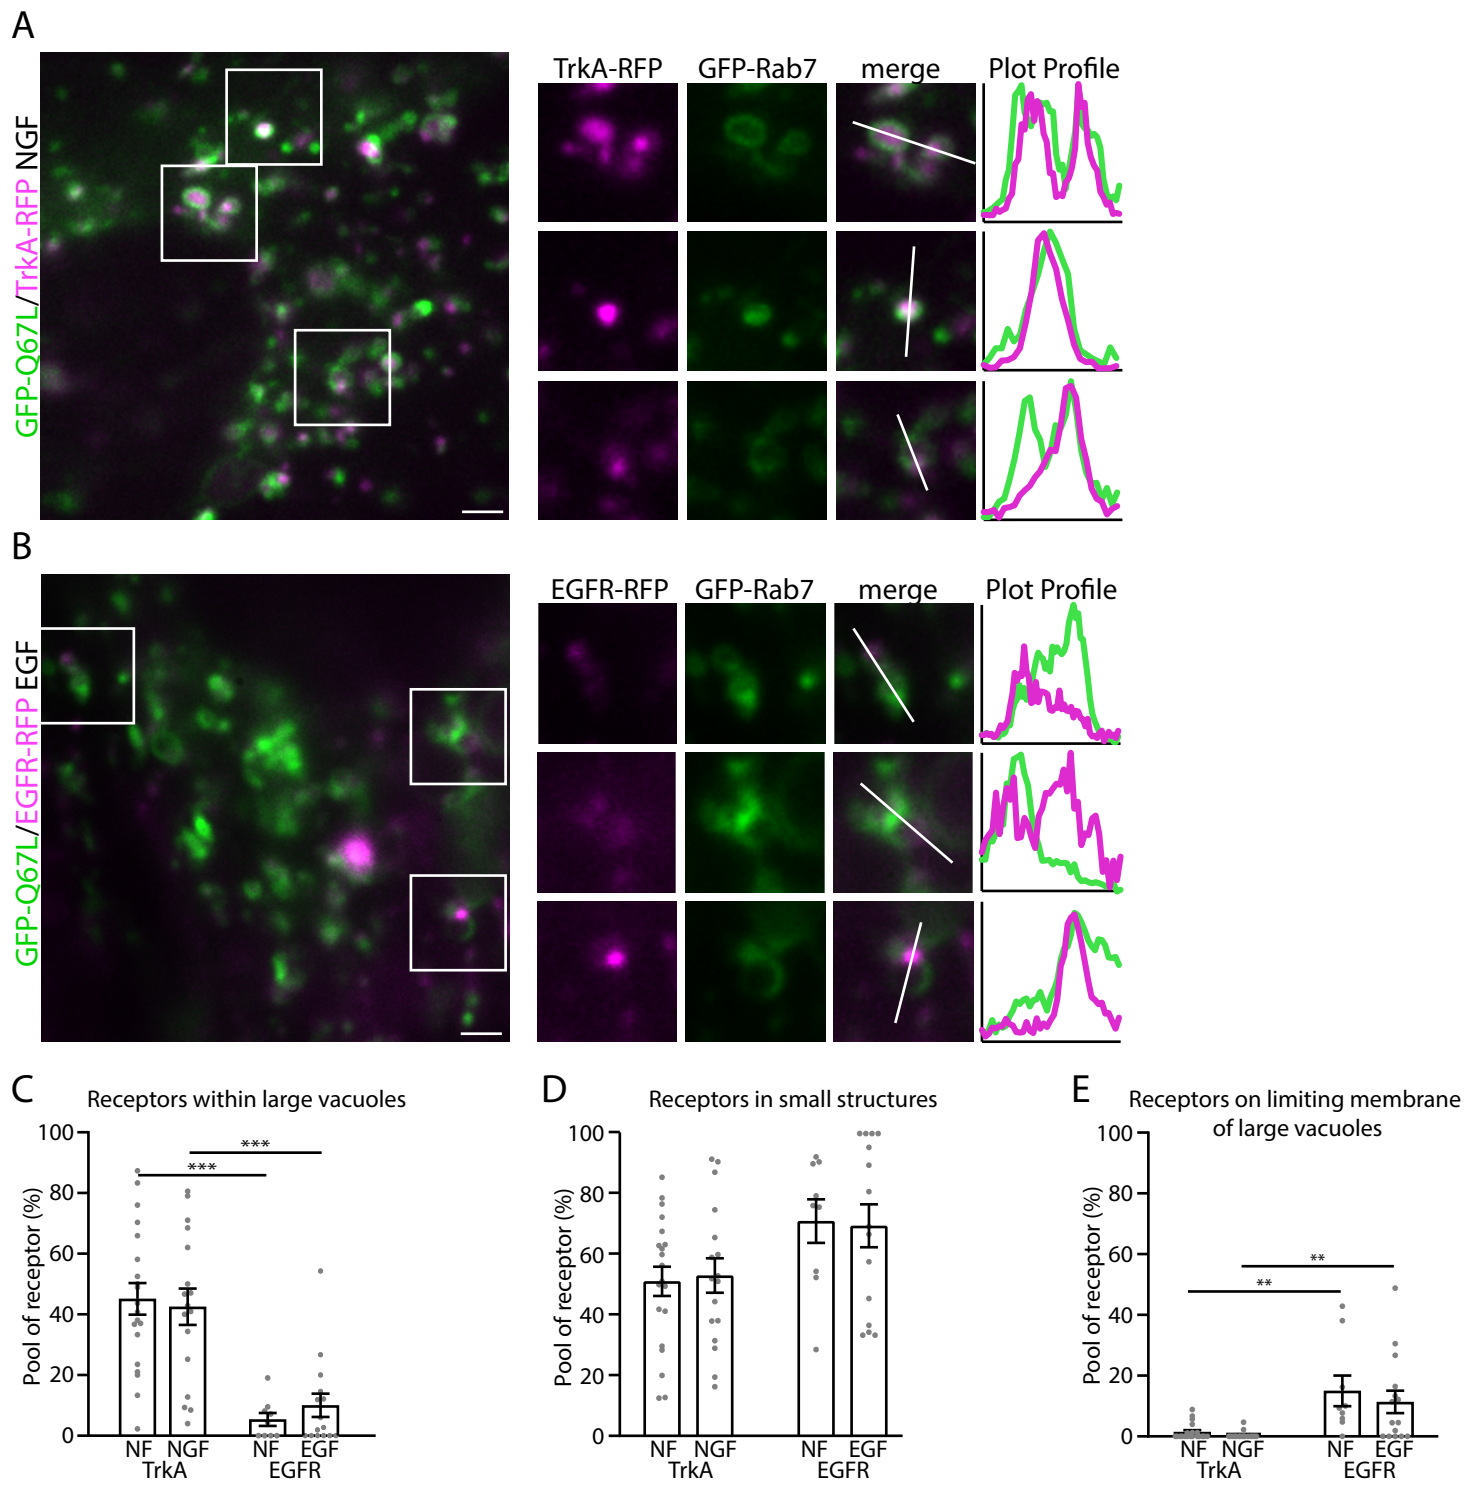

**Fig. S3. Q67L induces TrkA localization within large vacuolar structures.** (A, B) Representative TIRF microscopy images of MEFs co-transfected with GFP-tagged Rab7 Q67L and RFP-tagged receptor (TrkA or EGFR), in the presence or absence of its respective ligand (100ng/ml NGF, EGF). Line histograms show receptors being localized within Rab7 vacuoles, on the rim of Rab7 vacuoles and on small Rab7 structures; scale bar= 2 $\mu$ m. (C) Quantification of proportion of receptors (TrkA, EGFR) localized within large vacuolar Rab7-Q67L structures. TrkA NF vs EGFR NF:  $p < 0.0001$ ; TrkA NGF vs EGFR EGF:  $p = 0.0001$ . (D) Quantification of proportion of receptors (TrkA, EGFR) localized to small structures. (E) Quantification of proportion of receptors localized on the limiting membrane of large vacuolar Rab7 structures. TrkA NF vs EGFR NF:  $p = 0.0022$ ; TrkA NGF vs EGFR EGF:  $p = 0.0058$ . Significance was determined by one-way ANOVA with post hoc Sidak's;  $n = 7$  videos per condition in three independent experiments; error= SEM, \*\* $p < 0.01$ , \*\*\* $p < 0.001$ .

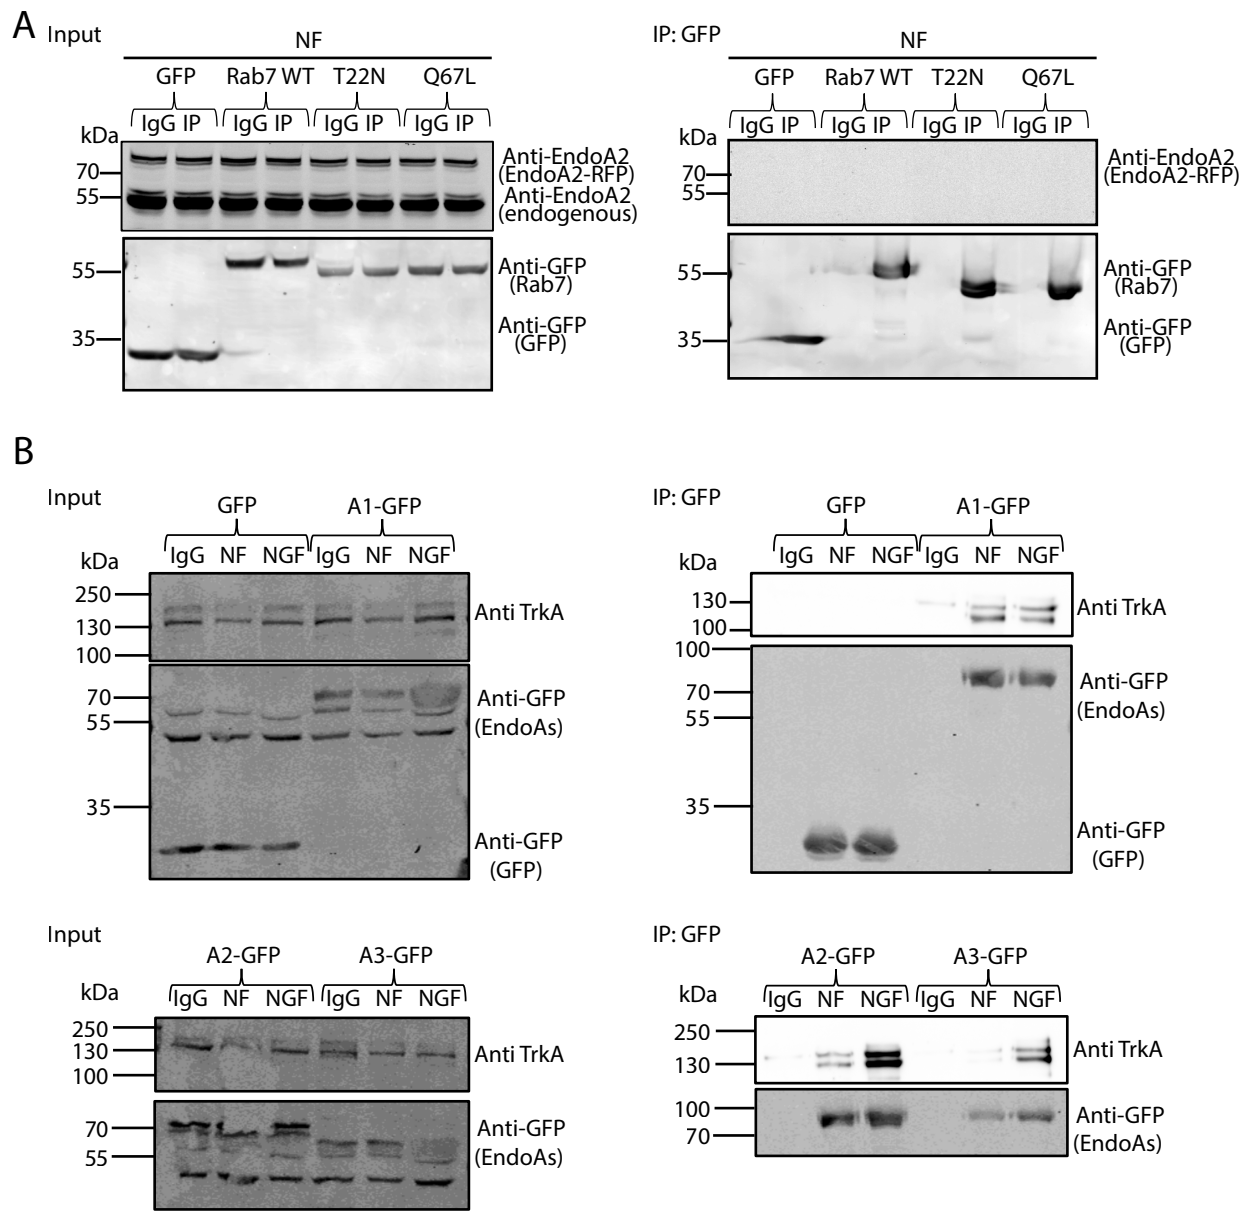

**Fig. S4. EndophilinA2 does not associate with late Rab7 in non-stimulated conditions.** (A) Input is shown on the left, IP on the right. GFP-conjugated beads (or IgG control beads) were used to pull down GFP-Rab7 (WT, T22N, Q67L) showing no interaction with EndophilinA2-RFP in non-stimulated HeK293 cells. (B) GFP-conjugated beads (or IgG control beads) were used to pull down GFP, EndophilinA1, A2, or A3-GFP in with TrkA-RFP co-transfected HeK293 cells (Input is IP on the right) in the presence or absence 100 ng/ml NGF.

Suppl. 5

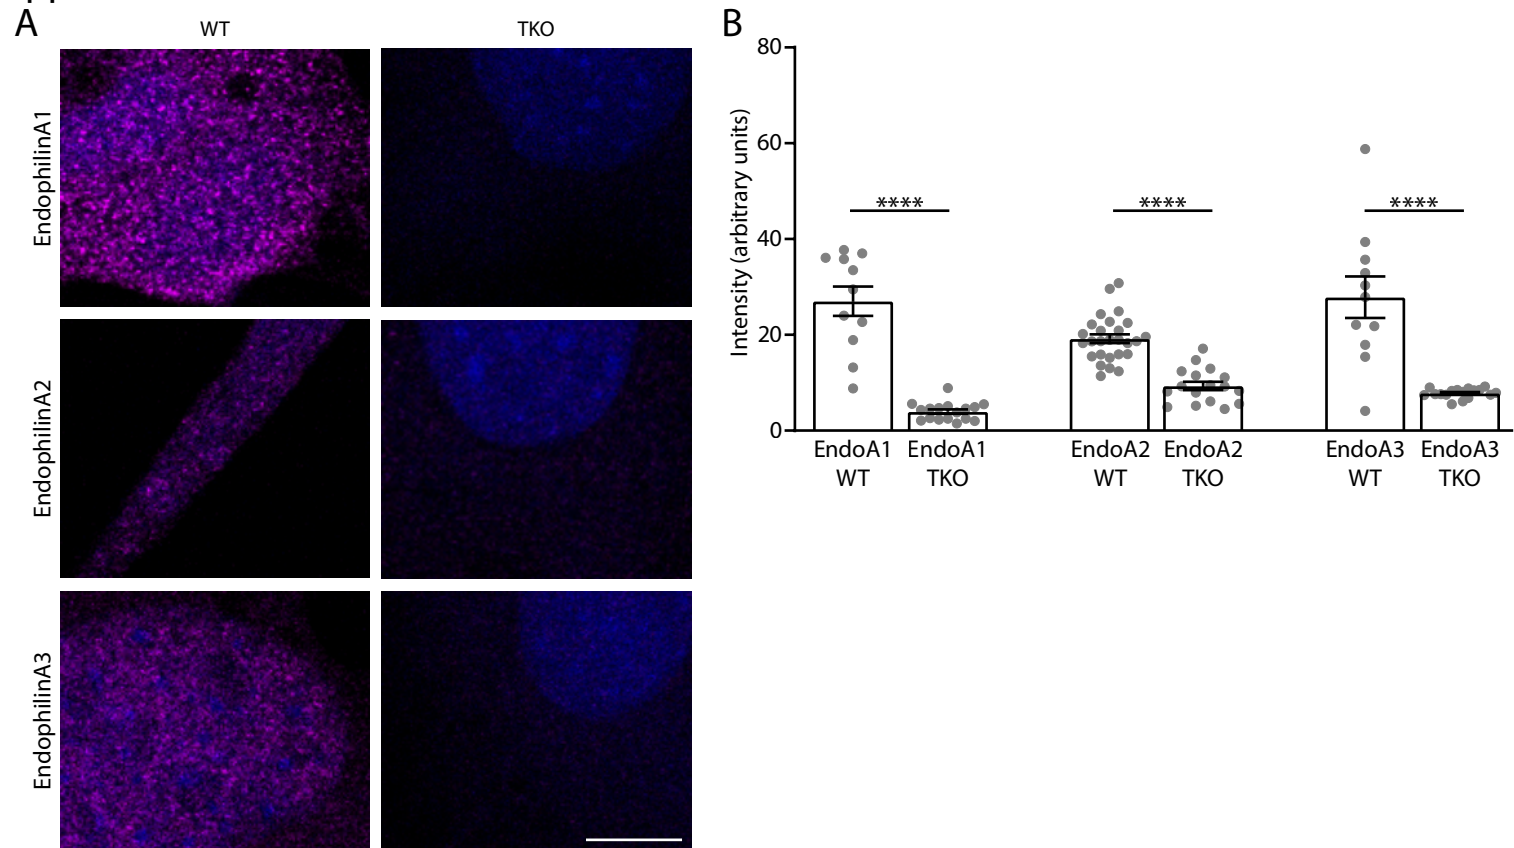

**Fig. S5. EndophilinA TKO MEFs do not stain for EndophilinAs.** (A) WT and EndophilinA TKO MEFs stained against EndophilinA1,2, and 3, scale bar= 10  $\mu$ m. (B) Quantification of staining intensity in WT and TKO MEFs. Significance was determined by student's t-test, \*\*\*\* $p$ <0.0001.

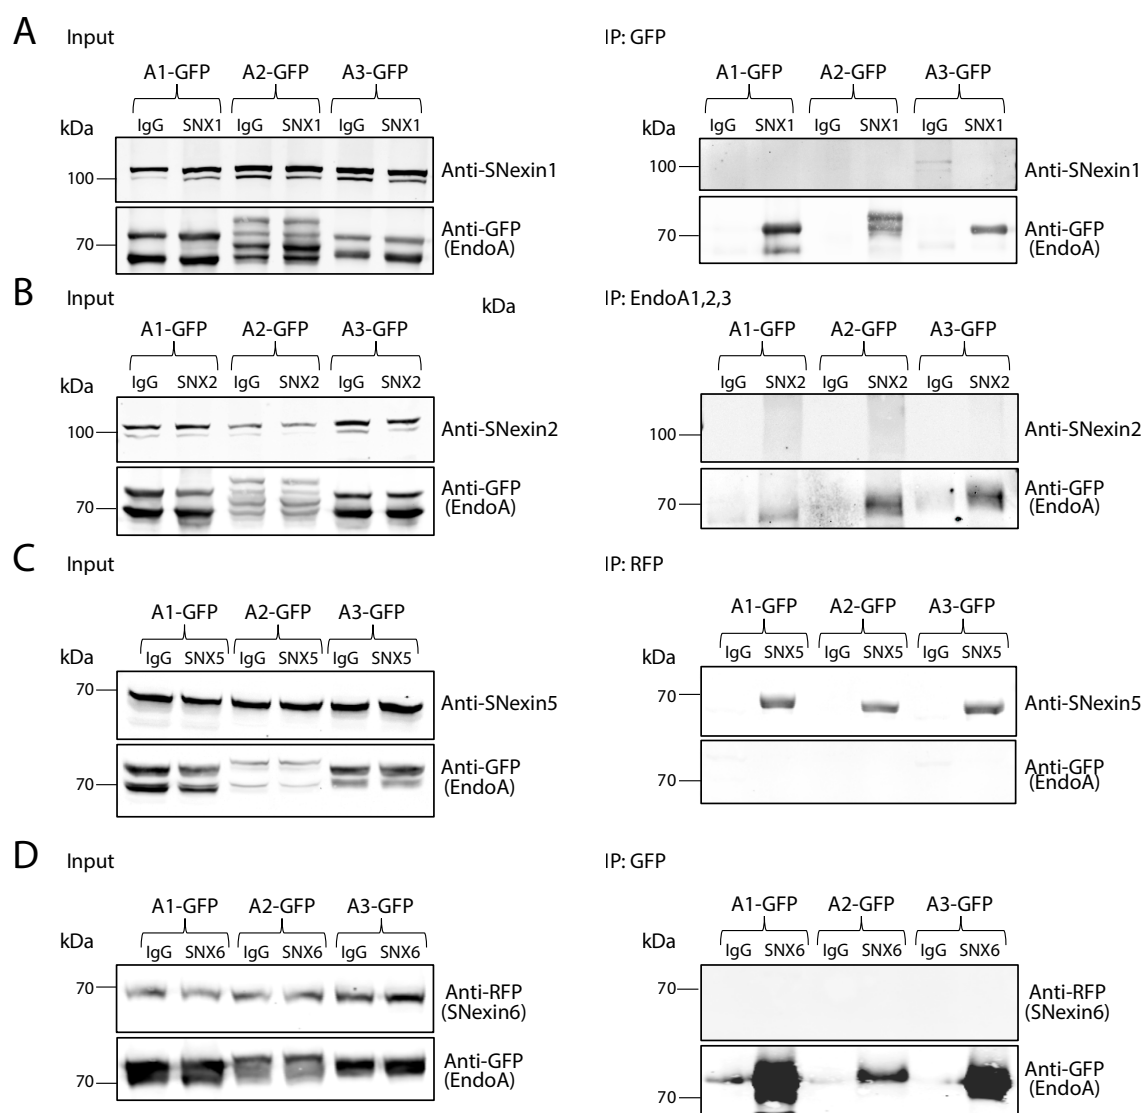

**Fig. S6. EndophilinAs do not bind Snxs of retromer complex co-transfected in HEK293 cells. (A)** EndophilinAs do not co-immunoprecipitate with Snx1. **(B)** EndophilinAs do not co-immunoprecipitate with Snx2. **(C)** EndophilinAs do not co-immunoprecipitate with Snx5. **(D)** EndophilinAs do not co-immunoprecipitate with Snx6.

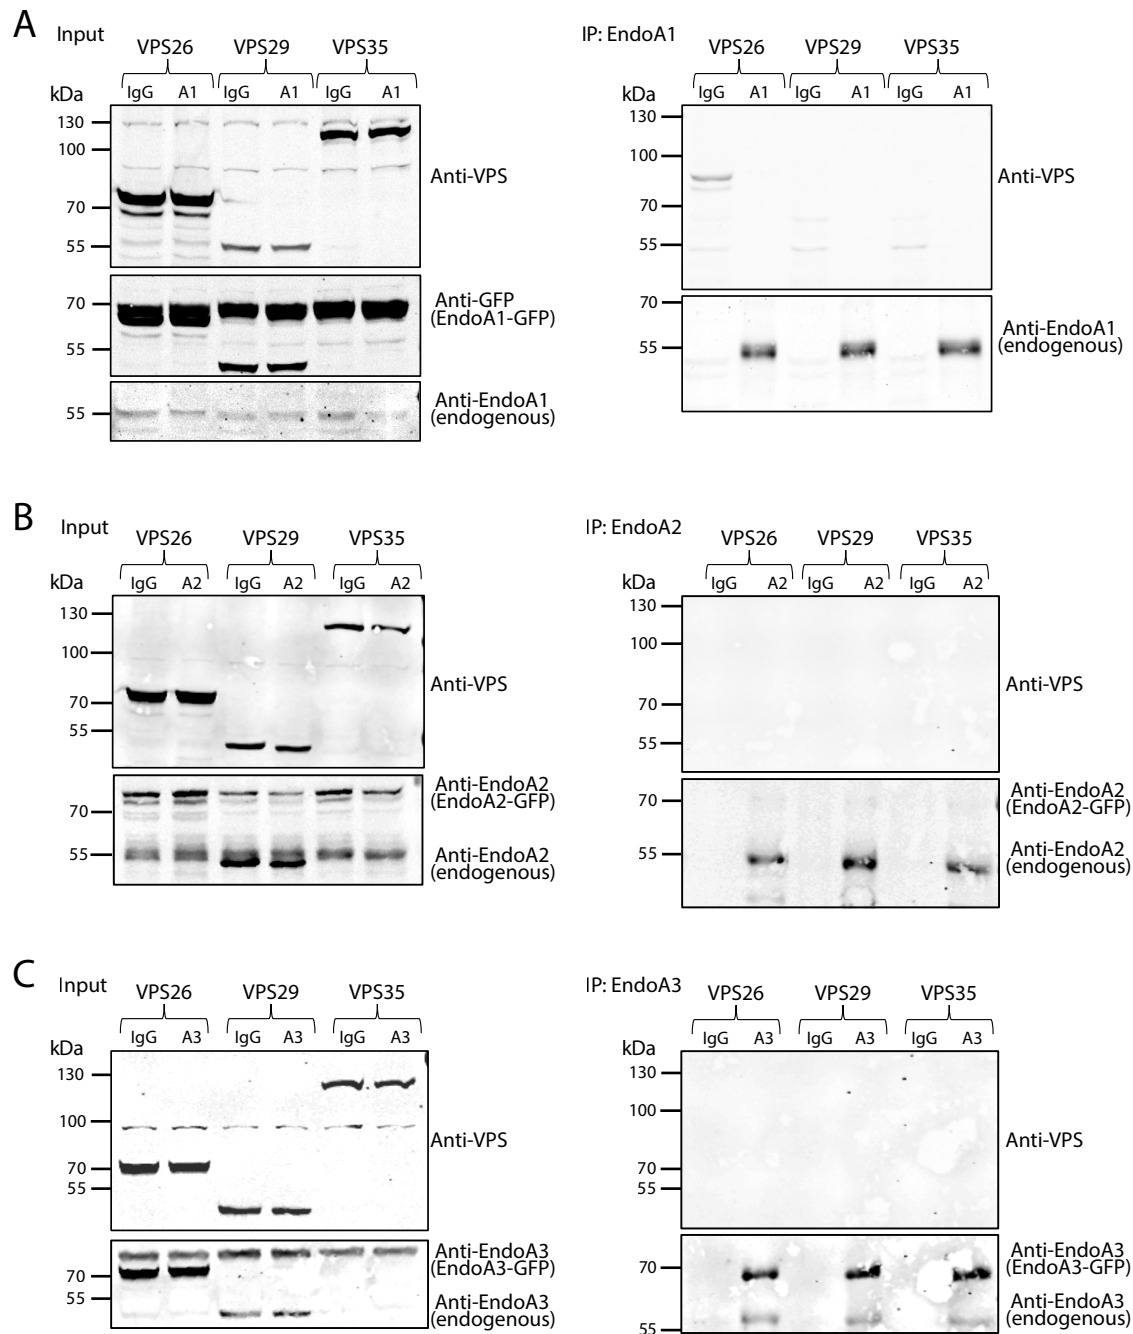

**Fig. S7. EndophilinAs do not bind the cargo recognition unit of retromer complex co-transfected in HEK293 cells. (A)** EndophilinAs do not co-immunoprecipitate with VPS26. **(B)** EndophilinAs do not co-immunoprecipitate with VPS29. **(C)** EndophilinAs do not co-immunoprecipitate with VPS35.



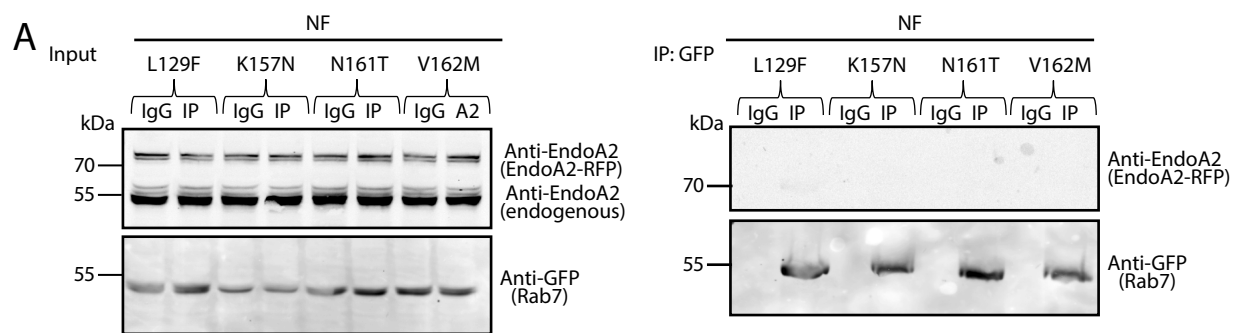

**Fig. S8. CMT2B-Rab7 mutations do not bind EndophilinA2 in non-stimulated HEK cells.** (A) GFP-conjugated beads (or IgG control beads) were used to pull down GFP-Rab7 WT and the CMT2B mutants L129F, K157N, N161T, V162M with EndophilinA2-RFP in non-stimulated Hek293 cells. Input is shown on the left, IP on the right.

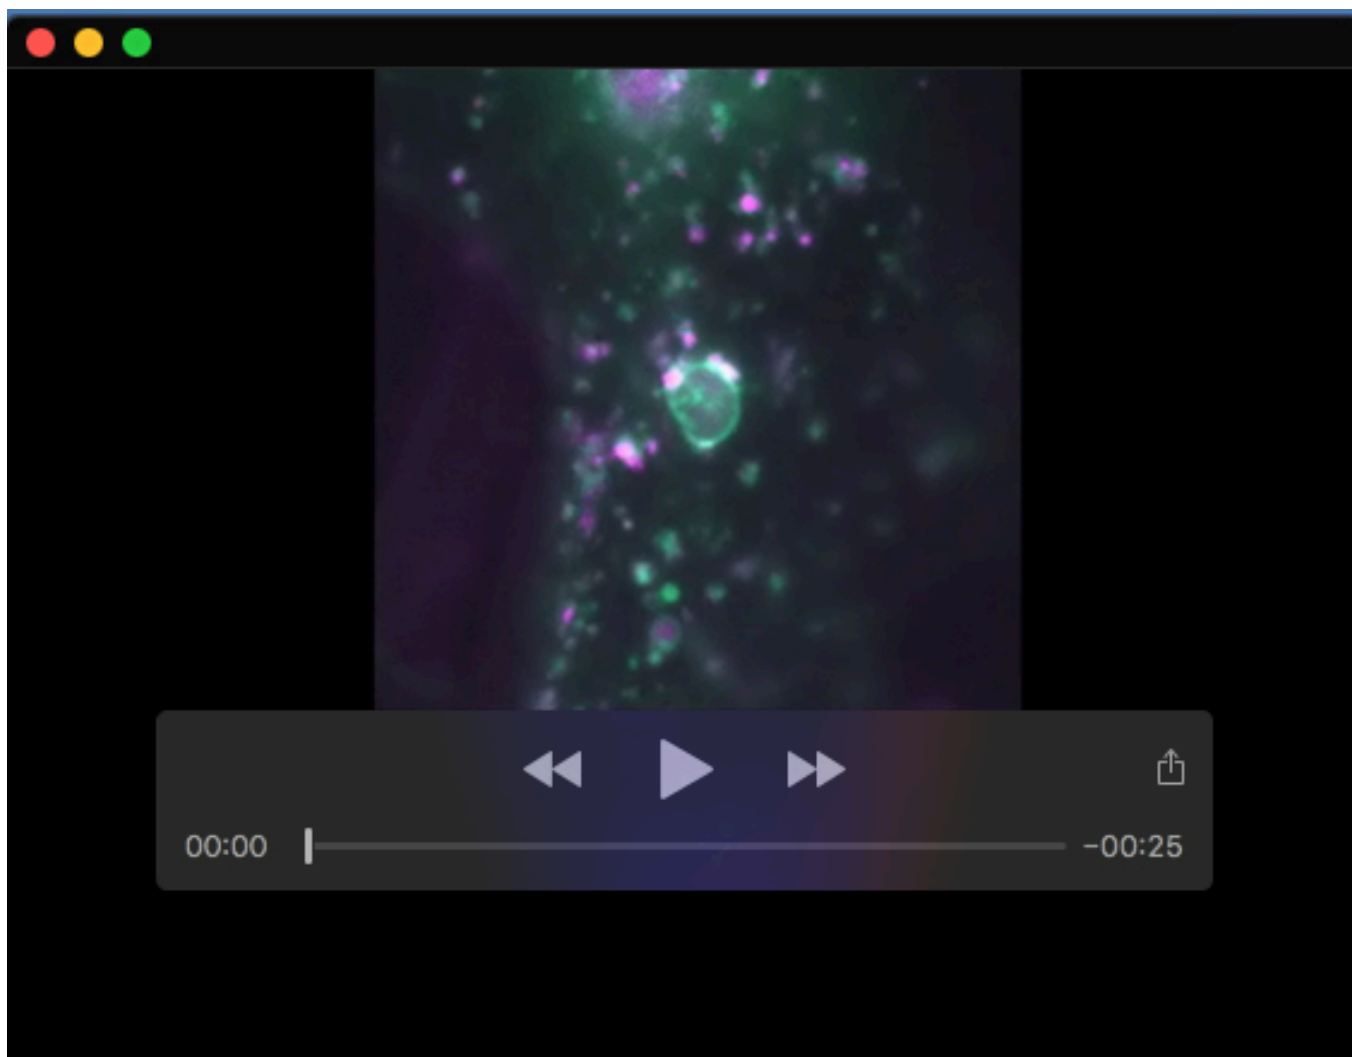

**Movie 1. Intraluminal Rab7 is bouncing in Rab7 vacuole.** (A) Live-TIRF acquisition of MEF co-transfected with GFP-Rab7 and TrkA-RFP.

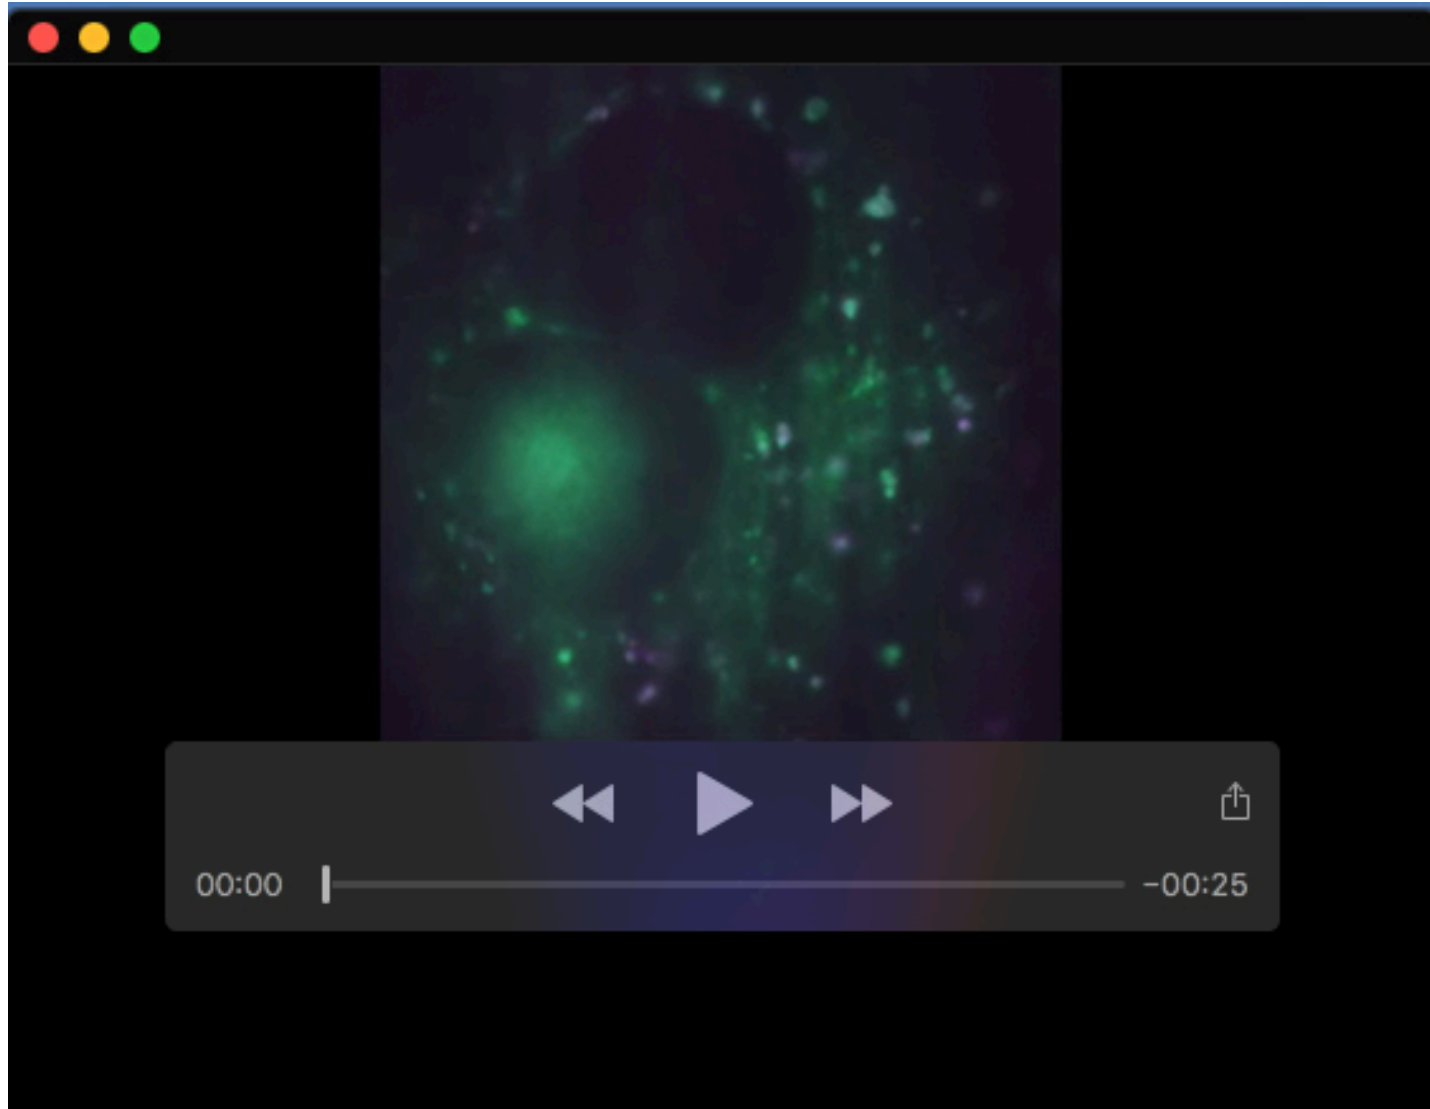

**Movie 2. No Rab7 tubulation without NGF.** (A) Live-TIRF acquisition of MEF co-transfected with GFP-Rab7 and TrkA-RFP in the absence of NGF shows a lack of tubulating events.

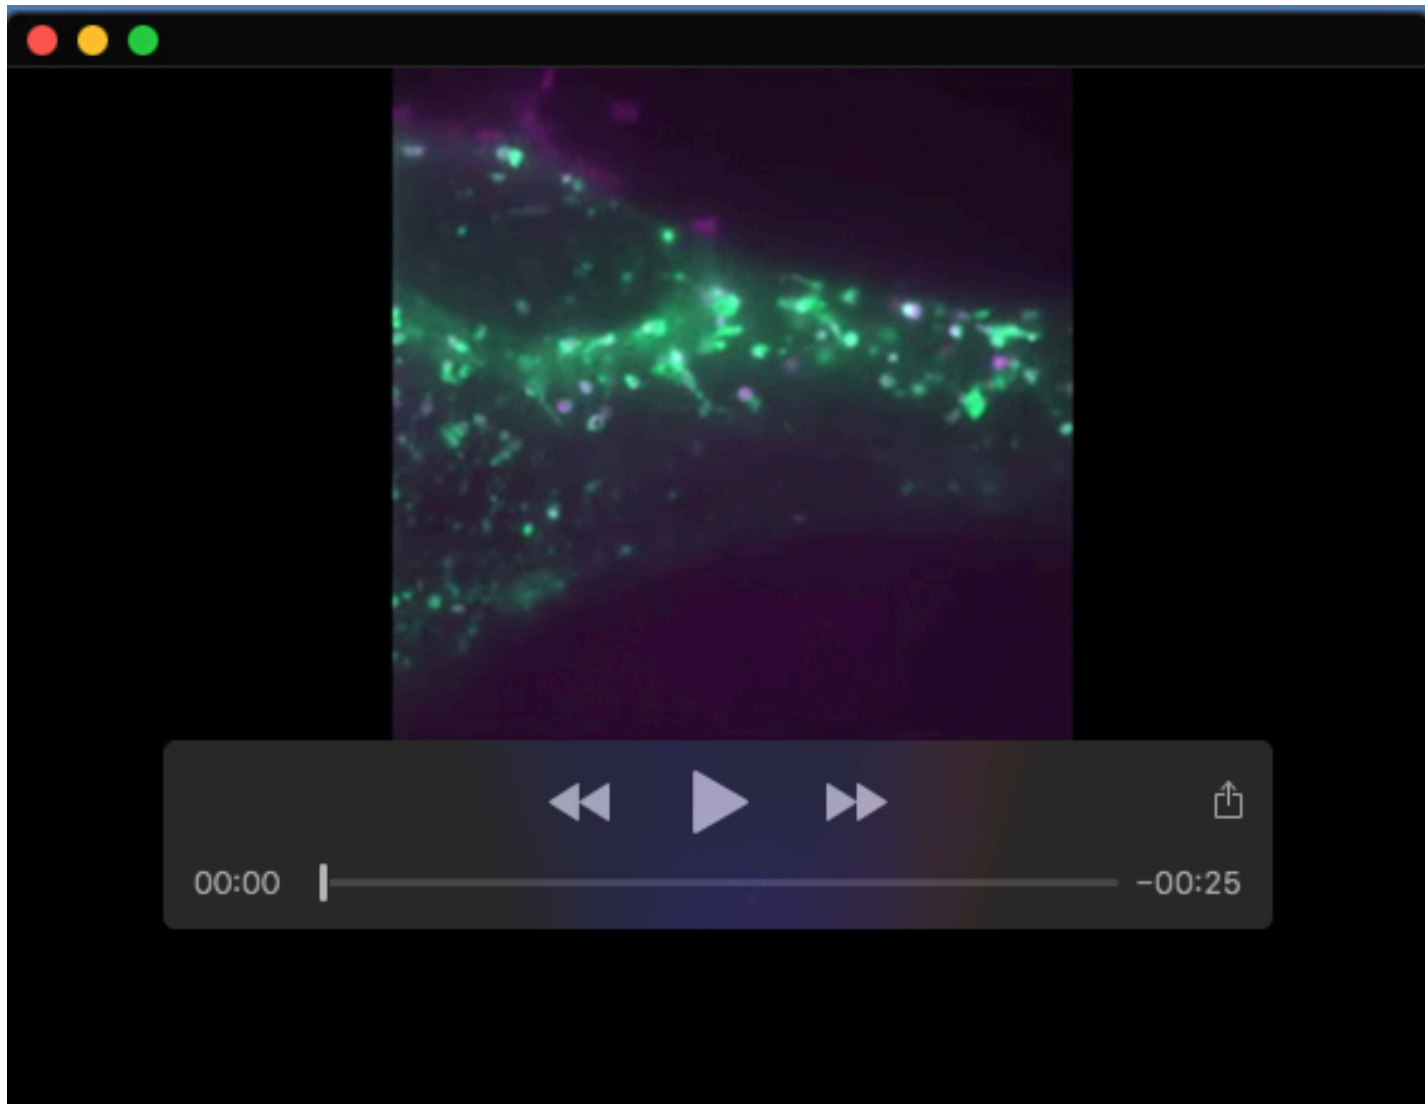

**Movie 3. Rab7 tubulations in response to NGF.** (A) Live-TIRF acquisition of MEF co-transfected with GFP-Rab7 and TrkA-RFP stimulated with NGF shows tubulating events.

**Table S1. Original data for results in Fig. 1H.**

[Click here to download Table S1](#)
